# Supplementary material
Source: PubMed Central journal article supplement (PMC3719870)
Supplement: NIHMS480126-supplement-Supplementary_Table.pdf [file NIHMS480126-supplement-Supplementary_Table.pdf]

| Metabolite ID                                     | Biological Pathway | Mono isotopic M/Z | RT    | Exp.    | q-value (2-way ANOVA) | Fold change (FC) (HCC vs. Cirrhosis) |             |             | Quality control (QC) values |       |         |
|---------------------------------------------------|--------------------|-------------------|-------|---------|-----------------------|--------------------------------------|-------------|-------------|-----------------------------|-------|---------|
|                                                   |                    |                   |       |         |                       | FC                                   | Lower       | Upper       | Average                     | STD   | RSD (%) |
|                                                   |                    |                   |       |         |                       |                                      | Bound of FC | Bound of FC |                             |       |         |
| <b>Verified Metabolites</b>                       |                    |                   |       |         |                       |                                      |             |             |                             |       |         |
| Phe-Phe                                           | Peptide            | (-) 311.1         | 174.5 | B1R&B2F | 0.0859                | 1.161                                | 1.033       | 1.304       | 4.744                       | 0.495 | 10.436  |
| 3beta, 6beta -dihydroxy-5beta -cholan-24-oic acid | Cholesterol        | (-) 391.3         | 286.7 | B1F&B2F | 0.0001                | 0.587                                | 0.469       | 0.734       | 5.922                       | 0.334 | 5.644   |
|                                                   |                    |                   |       | B1F&B2R | 0.0002                | 0.600                                | 0.480       | 0.750       | 5.888                       | 0.353 | 5.987   |
|                                                   |                    |                   |       | B1R&B2F | 0.0001                | 0.565                                | 0.446       | 0.717       | 5.559                       | 0.470 | 8.456   |
|                                                   |                    |                   |       | B1R&B2R | 0.0002                | 0.579                                | 0.457       | 0.733       | 5.528                       | 0.499 | 9.021   |
| Fragment of GDCA [-2H2O]                          | Cholesterol        | (+) 414.3         | 256.7 | B1F&B2F | 0.0013                | 0.790                                | 0.705       | 0.885       | 8.643                       | 0.353 | 4.085   |
|                                                   |                    |                   |       | B1F&B2R | 0.0027                | 0.781                                | 0.692       | 0.881       | 8.551                       | 0.339 | 3.969   |
|                                                   |                    |                   |       | B1R&B2F | 0.0021                | 0.782                                | 0.692       | 0.883       | 8.587                       | 0.257 | 2.992   |
|                                                   |                    |                   |       | B1R&B2R | 0.0030                | 0.773                                | 0.680       | 0.879       | 8.495                       | 0.244 | 2.872   |
| Fragment of GDCA [-H2O]                           | Cholesterol        | (+) 432.3         | 256.7 | B1F&B2F | 0.0010                | 0.802                                | 0.723       | 0.889       | 8.149                       | 0.334 | 4.096   |
|                                                   |                    |                   |       | B1F&B2R | 0.0019                | 0.791                                | 0.709       | 0.882       | 8.099                       | 0.321 | 3.966   |
|                                                   |                    |                   |       | B1R&B2F | 0.0018                | 0.799                                | 0.718       | 0.889       | 8.204                       | 0.261 | 3.183   |
|                                                   |                    |                   |       | B1R&B2R | 0.0023                | 0.788                                | 0.703       | 0.882       | 8.154                       | 0.249 | 3.055   |
| Fragment of GCDCA [-2H2O]                         | Cholesterol        | (+) 414.3         | 287.7 | B1F&B2F | 0.0147                | 0.882                                | 0.816       | 0.954       | 7.354                       | 0.338 | 4.595   |
|                                                   |                    |                   |       | B1F&B2R | 0.0286                | 0.875                                | 0.806       | 0.949       | 7.244                       | 0.343 | 4.732   |
|                                                   |                    |                   |       | B1R&B2F | 0.0201                | 0.885                                | 0.818       | 0.957       | 7.306                       | 0.291 | 3.989   |
|                                                   |                    |                   |       | B1R&B2R | 0.0246                | 0.878                                | 0.809       | 0.953       | 7.194                       | 0.297 | 4.123   |
| Fragment of GCDCA [- H2O]                         | Cholesterol        | (+) 432.3         | 287.7 | B1F&B2F | 0.0194                | 0.890                                | 0.824       | 0.961       | 7.310                       | 0.320 | 4.378   |
|                                                   |                    |                   |       | B1F&B2R | 0.0350                | 0.885                                | 0.817       | 0.957       | 7.282                       | 0.317 | 4.354   |
|                                                   |                    |                   |       | B1R&B2F | 0.0189                | 0.887                                | 0.823       | 0.957       | 7.384                       | 0.290 | 3.923   |
|                                                   |                    |                   |       | B1R&B2R | 0.0246                | 0.883                                | 0.817       | 0.954       | 7.356                       | 0.287 | 3.904   |
| Oleoylcarnitine                                   | Carnitine          | (+) 426.3         | 374.6 | B1R&B2F | 0.0019                | 0.906                                | 0.864       | 0.950       | 6.241                       | 0.120 | 1.927   |
|                                                   |                    |                   |       | B1R&B2R | 0.0031                | 0.907                                | 0.864       | 0.951       | 6.439                       | 0.062 | 0.958   |

|                                       |             |           |       |         |        |       |       |       |       |       |       |
|---------------------------------------|-------------|-----------|-------|---------|--------|-------|-------|-------|-------|-------|-------|
| GDCA                                  | Cholesterol | (-) 448.3 | 256.6 | B1F&B2F | 0.0011 | 0.792 | 0.710 | 0.884 | 9.497 | 0.267 | 2.808 |
|                                       |             |           |       | B1F&B2R | 0.0022 | 0.793 | 0.706 | 0.890 | 9.469 | 0.333 | 3.512 |
|                                       |             |           |       | B1R&B2F | 0.0013 | 0.787 | 0.702 | 0.883 | 8.854 | 0.782 | 8.836 |
|                                       |             |           |       | B1R&B2R | 0.0039 | 0.788 | 0.698 | 0.890 | 8.829 | 0.855 | 9.683 |
| [Na <sup>+</sup> +GDCA]               | Cholesterol | (+) 472.3 | 256.6 | B1F&B2F | 0.0008 | 0.717 | 0.616 | 0.834 | 6.553 | 0.339 | 5.172 |
|                                       |             |           |       | B1F&B2R | 0.0014 | 0.711 | 0.607 | 0.832 | 6.488 | 0.310 | 4.778 |
|                                       |             |           |       | B1R&B2F | 0.0013 | 0.702 | 0.598 | 0.825 | 6.586 | 0.235 | 3.564 |
|                                       |             |           |       | B1R&B2R | 0.0016 | 0.696 | 0.589 | 0.823 | 6.520 | 0.206 | 3.163 |
| Fragment of GCA [- 2H <sub>2</sub> O] | Cholesterol | (+) 430.3 | 257.8 | B1F&B2F | 0.0658 | 0.919 | 0.853 | 0.991 | 6.579 | 0.152 | 2.317 |
|                                       |             |           |       | B1R&B2F | 0.0902 | 0.910 | 0.839 | 0.987 | 6.490 | 0.108 | 1.662 |
| Fragment of GCA [- H <sub>2</sub> O]  | Cholesterol | (+) 448.3 | 257.8 | B1F&B2F | 0.0658 | 0.915 | 0.847 | 0.990 | 6.367 | 0.148 | 2.321 |
|                                       |             |           |       | B1R&B2F | 0.0896 | 0.912 | 0.842 | 0.987 | 6.376 | 0.126 | 1.970 |
| GCA                                   | Cholesterol | (+) 466.3 | 257.8 | B1F&B2F | 0.0658 | 0.918 | 0.851 | 0.991 | 6.824 | 0.164 | 2.405 |
|                                       |             |           |       | B1R&B2F | 0.0938 | 0.919 | 0.853 | 0.990 | 6.940 | 0.130 | 1.867 |
| GDCA                                  | Cholesterol | (+) 450.3 | 256.8 | B1F&B2F | 0.0021 | 0.812 | 0.732 | 0.900 | 6.558 | 0.368 | 5.611 |
|                                       |             |           |       | B1F&B2R | 0.0052 | 0.792 | 0.703 | 0.893 | 6.586 | 0.409 | 6.207 |
|                                       |             |           |       | B1R&B2F | 0.0018 | 0.798 | 0.716 | 0.890 | 6.781 | 0.243 | 3.587 |
|                                       |             |           |       | B1R&B2R | 0.0030 | 0.779 | 0.689 | 0.882 | 6.808 | 0.285 | 4.180 |
| [Na <sup>+</sup> +GCDCA]              | Cholesterol | (+) 472.3 | 287.7 | B1F&B2F | 0.0081 | 0.835 | 0.752 | 0.927 | 5.752 | 0.314 | 5.453 |
|                                       |             |           |       | B1F&B2R | 0.0230 | 0.834 | 0.749 | 0.929 | 5.690 | 0.305 | 5.365 |
|                                       |             |           |       | B1R&B2F | 0.0166 | 0.849 | 0.767 | 0.940 | 5.805 | 0.278 | 4.785 |
|                                       |             |           |       | B1R&B2R | 0.0252 | 0.848 | 0.764 | 0.942 | 5.743 | 0.270 | 4.698 |
| GCDCA                                 | Cholesterol | (+) 450.3 | 287.7 | B1F&B2F | 0.0147 | 0.849 | 0.766 | 0.942 | 6.185 | 0.300 | 4.851 |
|                                       |             |           |       | B1F&B2R | 0.0334 | 0.845 | 0.760 | 0.940 | 6.246 | 0.297 | 4.753 |
|                                       |             |           |       | B1R&B2F | 0.0219 | 0.866 | 0.788 | 0.952 | 6.404 | 0.293 | 4.568 |
|                                       |             |           |       | B1R&B2R | 0.0267 | 0.862 | 0.782 | 0.949 | 6.466 | 0.290 | 4.478 |

**Unidentified Metabolites**

|                                             |                     |           |       |         |        |       |       |       |       |       |       |
|---------------------------------------------|---------------------|-----------|-------|---------|--------|-------|-------|-------|-------|-------|-------|
| 3-ganidinopropionicacid                     | Carboxylic acic (+) | 132.1     | 53    | B1F&B2F | 0.0599 | 1.028 | 1.004 | 1.053 | 8.917 | 0.545 | 6.107 |
|                                             |                     |           |       | B1R&B2F | 0.0938 | 1.027 | 1.004 | 1.052 | 9.066 | 0.523 | 5.769 |
| 10-hydroxy-2E;8E-decadiene-4,6-diynoic acid | Fatty acid          | (+) 181.1 | 262.7 | B1F&B2F | 0.0346 | 1.122 | 1.031 | 1.222 | 5.269 | 0.365 | 6.931 |
|                                             |                     |           |       | B1F&B2R | 0.0835 | 1.126 | 1.031 | 1.228 | 5.184 | 0.357 | 6.895 |
|                                             |                     |           |       | B1R&B2F | 0.0689 | 1.119 | 1.024 | 1.223 | 5.250 | 0.370 | 7.053 |
|                                             |                     |           |       | B1R&B2R | 0.0900 | 1.122 | 1.025 | 1.229 | 5.164 | 0.363 | 7.020 |
| Phenylmethyl methyl ketone                  | Ketone              | (+) 135.1 | 198.8 | B1F&B2F | 0.0200 | 0.964 | 0.941 | 0.988 | 4.735 | 0.207 | 4.369 |
|                                             |                     |           |       | B1F&B2R | 0.0924 | 0.958 | 0.927 | 0.990 | 4.678 | 0.433 | 9.251 |
|                                             |                     |           |       | B1R&B2F | 0.0333 | 0.957 | 0.928 | 0.986 | 4.455 | 0.108 | 2.432 |
|                                             |                     |           |       | B1R&B2R | 0.0642 | 0.950 | 0.915 | 0.987 | 4.399 | 0.239 | 5.429 |
| L-N2-(2-arboxyethyl) arginine               | Peptide             | (+) 247.1 | 256.6 | B1R&B2F | 0.0018 | 0.730 | 0.625 | 0.853 | 4.986 | 0.112 | 2.241 |
|                                             |                     |           |       | B1R&B2R | 0.0023 | 0.681 | 0.563 | 0.823 | 4.912 | 0.207 | 4.224 |
| Octadecadienal                              | Aldehyde            | (+) 265.3 | 428.7 | B1F&B2F | 0.0419 | 0.952 | 0.916 | 0.989 | 6.264 | 0.250 | 3.990 |
|                                             |                     |           |       | B1R&B2F | 0.0457 | 0.943 | 0.904 | 0.985 | 6.230 | 0.104 | 1.672 |
|                                             |                     |           |       | B1R&B2R | 0.0751 | 0.940 | 0.897 | 0.985 | 6.241 | 0.255 | 4.085 |
| Linoelaidic Acid/ otadecadienoic acid       | Fatty acid          | (+) 281.3 | 446.3 | B1F&B2F | 0.0658 | 0.941 | 0.892 | 0.993 | 6.017 | 0.068 | 1.132 |
| Oleamide                                    | Fatty acid          | (+) 282.3 | 429.4 | B1F&B2F | 0.0503 | 0.963 | 0.934 | 0.993 | 8.675 | 0.267 | 3.073 |
|                                             |                     |           |       | B1R&B2F | 0.0743 | 0.962 | 0.932 | 0.992 | 8.719 | 0.140 | 1.609 |
| O-octanoyl-R-carnitine                      | Fatty acid          | (+) 288.2 | 307.3 | B1R&B2F | 0.0051 | 0.983 | 0.974 | 0.992 | 7.384 | 0.228 | 3.088 |

|                                |               |     |       |       |         |        |       |       |       |       |       |        |
|--------------------------------|---------------|-----|-------|-------|---------|--------|-------|-------|-------|-------|-------|--------|
| n-tosyl-L-lysiny methyl ketone | Ketone        | (+) | 299.1 | 445.3 | B1F&B2F | 0.0490 | 0.950 | 0.911 | 0.990 | 7.571 | 0.065 | 0.855  |
|                                |               |     |       |       | B1R&B2F | 0.0817 | 0.950 | 0.909 | 0.992 | 7.588 | 0.035 | 0.461  |
| Decanoyl-L-carnitine           | Carnitine     | (+) | 316.3 | 342.6 | B1R&B2F | 0.0599 | 0.985 | 0.974 | 0.997 | 6.755 | 0.088 | 1.308  |
| Tetracosahexaenoic acid        | Fatty acid    | (+) | 357.3 | 296.8 | B1F&B2F | 0.0004 | 0.629 | 0.516 | 0.767 | 5.084 | 0.293 | 5.770  |
|                                |               |     |       |       | B1F&B2R | 0.0002 | 0.560 | 0.438 | 0.715 | 5.047 | 0.486 | 9.629  |
|                                |               |     |       |       | B1R&B2F | 0.0002 | 0.605 | 0.491 | 0.745 | 4.937 | 0.360 | 7.289  |
|                                |               |     |       |       | B1R&B2R | 0.0001 | 0.535 | 0.413 | 0.692 | 4.899 | 0.553 | 11.290 |
| Palmitoyl carnitine            | Carnitine     | (+) | 400.3 | 368.9 | B1R&B2F | 0.0074 | 0.918 | 0.876 | 0.963 | 5.918 | 0.154 | 2.594  |
|                                |               |     |       |       | B1R&B2R | 0.0167 | 0.918 | 0.874 | 0.965 | 6.172 | 0.135 | 2.183  |
| Linoelaidyl carnitine          | Carnitine     | (+) | 424.3 | 358.7 | B1R&B2F | 0.0034 | 0.883 | 0.829 | 0.941 | 5.791 | 0.189 | 3.266  |
|                                |               |     |       |       | B1R&B2R | 0.0081 | 0.887 | 0.831 | 0.946 | 5.884 | 0.115 | 1.963  |
| PC(O-16:0/0:0)                 | Phospholipids | (+) | 482.4 | 385.2 | B1F&B2F | 0.0346 | 0.943 | 0.903 | 0.985 | 6.378 | 0.445 | 6.970  |
|                                |               |     |       |       | B1R&B2F | 0.0938 | 0.951 | 0.910 | 0.994 | 6.640 | 0.161 | 2.418  |
| LysoPC(20:1)                   | Phospholipids | (+) | 550.4 | 412.8 | B1F&B2F | 0.0679 | 0.957 | 0.920 | 0.996 | 5.499 | 0.135 | 2.463  |
|                                |               |     |       |       | B1R&B2F | 0.0473 | 0.945 | 0.907 | 0.986 | 5.661 | 0.098 | 1.729  |
|                                |               |     |       |       | B1R&B2R | 0.0822 | 0.949 | 0.911 | 0.988 | 5.754 | 0.079 | 1.377  |
| CerP(d18:1/12:0)               | Phospholipids | (+) | 562.4 | 442.2 | B1F&B2F | 0.0683 | 0.929 | 0.869 | 0.994 | 5.961 | 0.113 | 1.891  |
| LysoPC(20:4)                   | Phospholipids | (+) | 544.3 | 464.2 | B1F&B2R | 0.0350 | 0.840 | 0.751 | 0.941 | 4.673 | 0.236 | 5.046  |
|                                |               |     |       |       | B1R&B2R | 0.0434 | 0.841 | 0.743 | 0.950 | 5.027 | 0.401 | 7.982  |
| 4E;15Z-Bilirubin IXa           | Porphyrins    | (+) | 585.3 | 457   | B1F&B2F | 0.0597 | 0.959 | 0.925 | 0.994 | 7.981 | 0.095 | 1.188  |
|                                |               |     |       |       | B1R&B2F | 0.0942 | 0.960 | 0.926 | 0.995 | 8.059 | 0.078 | 0.964  |
| PE(20:4/18:1)                  | Phospholipids | (+) | 766.5 | 395.5 | B1F&B2F | 0.0980 | 0.981 | 0.961 | 1.001 | 9.871 | 0.082 | 0.828  |

|                                                          |             |           |       |         |        |       |       |       |       |       |        |
|----------------------------------------------------------|-------------|-----------|-------|---------|--------|-------|-------|-------|-------|-------|--------|
|                                                          |             |           |       | B1R&B2F | 0.0305 | 0.969 | 0.948 | 0.990 | 9.530 | 0.204 | 2.143  |
|                                                          |             |           |       | B1R&B2R | 0.0275 | 0.963 | 0.940 | 0.987 | 9.464 | 0.103 | 1.084  |
| L-alanine/Beta-leucine/T-butyl glycine                   | Peptide     | (-) 131.1 | 154.5 | B1F&B2F | 0.0317 | 0.942 | 0.905 | 0.982 | 5.620 | 0.131 | 2.324  |
|                                                          |             |           |       | B1F&B2R | 0.0334 | 0.943 | 0.905 | 0.982 | 5.536 | 0.080 | 1.448  |
|                                                          |             |           |       | B1R&B2F | 0.0315 | 0.941 | 0.904 | 0.980 | 5.216 | 0.525 | 10.072 |
|                                                          |             |           |       | B1R&B2R | 0.0506 | 0.941 | 0.904 | 0.980 | 5.129 | 0.465 | 9.061  |
| Hydroxypalmiticacid                                      | Fatty acid  | (-) 271.2 | 406.1 | B1F&B2F | 0.0410 | 0.941 | 0.900 | 0.983 | 5.550 | 0.153 | 2.757  |
|                                                          |             |           |       | B1F&B2R | 0.0813 | 0.945 | 0.903 | 0.990 | 5.847 | 0.244 | 4.166  |
| 3-hydroxy-eicosanoic acid                                | Fatty acid  | (-) 327.3 | 443.4 | B1F&B2F | 0.0032 | 0.887 | 0.832 | 0.944 | 5.213 | 0.158 | 3.040  |
|                                                          |             |           |       | B1F&B2R | 0.0084 | 0.890 | 0.834 | 0.951 | 5.316 | 0.122 | 2.294  |
| 3 alpha,7beta-dihydroxy-5 beta-cholest-24-en-26-oic acid | Cholesterol | (-) 431.3 | 411.9 | B1F&B2F | 0.0806 | 0.920 | 0.856 | 0.988 | 5.076 | 0.255 | 5.022  |
| TCDCa                                                    | Cholesterol | (-) 498.3 | 233.5 | B1F&B2F | 0.0027 | 0.737 | 0.628 | 0.865 | 7.686 | 0.429 | 5.586  |
|                                                          |             |           |       | B1F&B2R | 0.0023 | 0.742 | 0.637 | 0.864 | 7.668 | 0.399 | 5.200  |
|                                                          |             |           |       | B1R&B2F | 0.0036 | 0.728 | 0.614 | 0.864 | 6.523 | 1.516 | 23.238 |
|                                                          |             |           |       | B1R&B2R | 0.0044 | 0.733 | 0.623 | 0.863 | 6.503 | 1.486 | 22.856 |
| 15,16-dihydrobiliverdin                                  | Porphyrins  | (-) 581.2 | 445.3 | B1F&B2F | 0.0595 | 0.905 | 0.837 | 0.979 | 5.675 | 0.121 | 2.129  |
|                                                          |             |           |       | B1F&B2R | 0.0916 | 0.909 | 0.839 | 0.985 | 5.625 | 0.120 | 2.138  |

---
